# Supplementary material
Source: PubMed Central journal article supplement (PMC7528316)
Supplement: ao0c03113_si_001.pdf [file ao0c03113_si_001.pdf]

Supporting Information for:

# $^{13}\text{C}$ CP/MAS NMR can discriminate genetic backgrounds of rice starch

*Etsuko Katoh<sup>1\*</sup>, Katsuyoshi Murata<sup>1</sup>, and Naoko Fujita<sup>2</sup>*

<sup>1</sup>Advanced Analysis Center, National Agriculture and Food Research Organization, 2-1-2 Kannondai, Tsukuba, Ibaraki 305-0856, Japan

<sup>2</sup>Department of Biological Production, Akita Prefectural University, 241-438 Shimoshinjo-Nakano, Kaidobata-Nishi, Akita, Akita 010-0195, Japan

E-mail: [ekatoh@affrc.go.jp](mailto:ekatoh@affrc.go.jp)

## CONTENTS

Figure S1. Superimposed spectra for starch

Figure S2.  $^{13}\text{C}$  CP/MAS NMR subtraction spectra

Table S1  $^{13}\text{C}$  CP/MAS NMR data for C6 region.

Table S2  $^{13}\text{C}$  CP/MAS NMR data for C1 region.

Table S3  $^{13}\text{C}$  CP/MAS NMR subtraction data for C1 region.

Table S4  $^{13}\text{C}$  CP/MAS NMR subtraction data for C6 region.



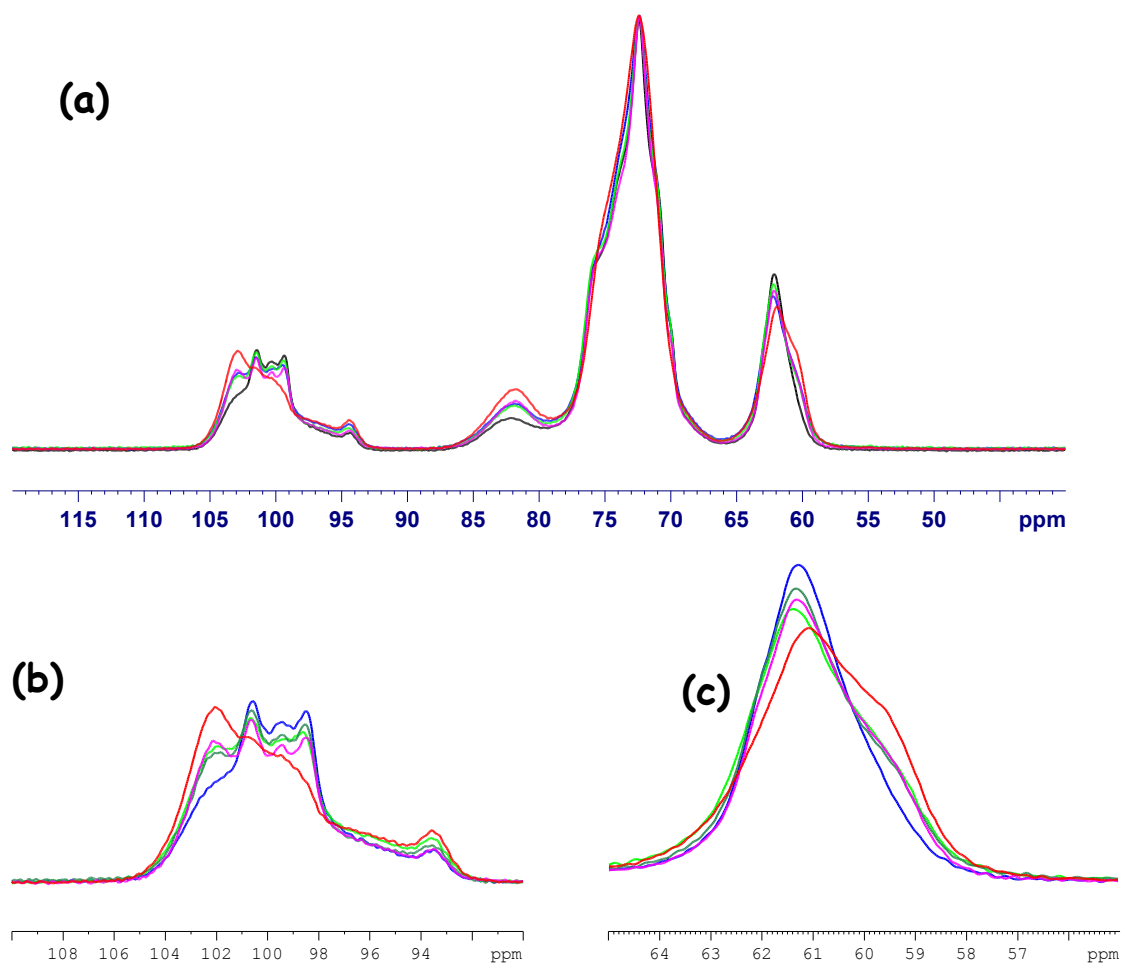

Figure S1. Superimposed spectra for (a) all region of starch, (b) expanded C1 and (c) C6 area for waxy (blue), japonica (right green), indica (green), SSIIIa-deficient mutant (magenta), and SSIIIa/BEIIb-deficient mutant (red).

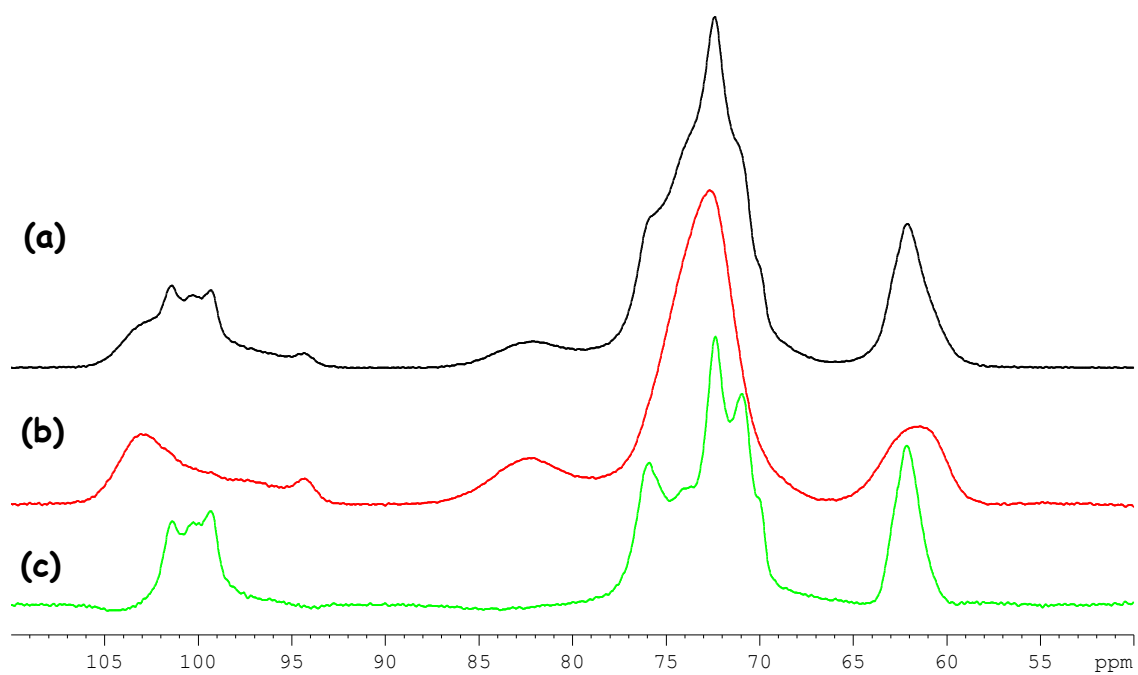

Figure S2.  $^{13}\text{C}$  CP/MAS NMR spectra for (a) waxy (black), (b) amorphous rice powder from japonica (red) and (c) waxy subtraction spectra using alpha rice as the amorphous standard (a)-(b) (green).

Table S1 <sup>13</sup>C CP/MAS NMR chemical shifts, peak width and integral area of deconvoluted peaks for C6 region.

|                                | peak1 |        |          |             | peak2 |        |          |             | Best Overlap(%) |
|--------------------------------|-------|--------|----------|-------------|-------|--------|----------|-------------|-----------------|
|                                | CS    | LB(Hz) | Integral | content (%) | CS    | LB(Hz) | Integral | content (%) |                 |
| waxy                           | 62.19 | 271    | 1        | 87.7        | 60.79 | 242    | 0.14     | 12.3        | 98.94           |
| japonica                       | 62.28 | 308    | 1        | 83.3        | 60.61 | 266    | 0.2      | 16.7        | 99.24           |
| indica                         | 62.27 | 281    | 1        | 82.6        | 60.61 | 260    | 0.21     | 17.4        | 99.03           |
| SSIIIa-deficient mutant        | 62.21 | 281    | 1        | 82.0        | 60.59 | 242    | 0.22     | 18.0        | 99              |
| SSIIIa/ BEIIb-deficient mutant | 62    | 352    | 1        | 84.7        | 60.46 | 227    | 0.18     | 15.3        | 98.7            |

Table S2 <sup>13</sup>C CP/MAS NMR chemical shifts, peak width and integral area of deconvoluted peaks for C1 region.

|                                       | peak 1                              | peak 2                | peak 3                | peak 4               | peak 5               | peak 6              | content of ordered structure <sup>a</sup> (%) |
|---------------------------------------|-------------------------------------|-----------------------|-----------------------|----------------------|----------------------|---------------------|-----------------------------------------------|
|                                       | CS (ppm)<br>LB (Hz)<br>Integral (%) |                       |                       |                      |                      |                     |                                               |
| <b>waxy</b>                           | 102.89<br>421<br>29.0               | 101.46<br>154<br>16.2 | 100.36<br>188<br>18.3 | 99.35<br>148<br>17.4 | 97.74<br>676<br>15.4 | 94.39<br>182<br>3.8 | 51.9                                          |
| <b>japonica</b>                       | 102.86<br>409<br>36.8               | 101.40<br>156<br>9.6  | 100.32<br>203<br>15.1 | 99.38<br>170<br>15.8 | 97.36<br>676<br>18.8 | 94.39<br>184<br>4   | 40.5                                          |
| <b>indica</b>                         | 102.94<br>383<br>33.4               | 101.52<br>142<br>11.0 | 100.41<br>216<br>19.1 | 99.37<br>147<br>15.4 | 97.60<br>695<br>18.4 | 94.42<br>191<br>2.7 | 45.5                                          |
| <b>SSIIIa-deficient mutant</b>        | 102.97<br>345<br>35.1               | 101.49<br>131<br>10.9 | 100.41<br>220<br>19.3 | 99.30<br>138<br>13.7 | 97.58<br>747<br>18.2 | 94.36<br>154<br>2.8 | 43.9                                          |
| <b>SSIIIa/ BEIIb-deficient mutant</b> | 102.93<br>385<br>45.2               | 101.04<br>249<br>14.5 | 99.81<br>259<br>13.6  |                      | 97.44<br>704<br>23.1 | 94.35<br>203<br>3.6 | 28.1                                          |

Table S3 <sup>13</sup>C CP/MAS NMR chemical shifts, peak width and integral area of deconvoluted peaks after subtraction for C1 region.

|                                       | peak 1                              | peak 2                | peak 3                | peak 4               | peak 5               |
|---------------------------------------|-------------------------------------|-----------------------|-----------------------|----------------------|----------------------|
|                                       | CS (ppm)<br>LB (Hz)<br>Integral (%) |                       |                       |                      |                      |
| <b>waxy</b>                           | 102.69<br>261<br>6.5                | 101.48<br>152<br>27.2 | 100.39<br>172<br>23.9 | 99.37<br>147<br>26.7 | 98.43<br>711<br>15.7 |
| <b>japonica</b>                       | 102.76<br>260<br>15.2               | 101.40<br>156<br>18.3 | 100.32<br>203<br>22.4 | 99.38<br>170<br>31.4 | 97.36<br>676<br>12.7 |
| <b>indica</b>                         | 102.88<br>240<br>15.2               | 101.52<br>142<br>23.7 | 100.41<br>216<br>21.3 | 99.37<br>147<br>30.6 | 97.60<br>695<br>9.1  |
| <b>SSIIIa-deficient mutant</b>        | 102.95<br>242<br>25                 | 101.49<br>131<br>27.5 | 100.41<br>220<br>19.8 | 99.30<br>138<br>10.0 | 97.58<br>747<br>18.0 |
| <b>SSIIIa/ BEIIb-deficient mutant</b> | 102.97<br>228<br>24.3               | 101.04<br>249<br>26.3 | 99.81<br>259<br>35.3  |                      | 97.44<br>704<br>14.1 |

Table S4 <sup>13</sup>C CP/MAS NMR chemical shifts, peak width and integral area of deconvoluted peaks after subtraction for C6 region.

|                               | peak1 |        |          |             | peak2 |        |          |             | Best Overlap(%) |
|-------------------------------|-------|--------|----------|-------------|-------|--------|----------|-------------|-----------------|
|                               | CS    | LB(Hz) | Integral | content (%) | CS    | LB(Hz) | Integral | content (%) |                 |
| waxy                          | 62.17 | 234    | 1        | 0.9         | 61.01 | 174    | 0.07     | 0.07        | 96.71           |
| japonica                      | 62.29 | 252    | 1        | 0.8         | 60.53 | 283    | 0.24     | 0.23        | 98.77           |
| indica                        | 62.26 | 232    | 1        | 0.8         | 60.63 | 268    | 0.22     | 0.21        | 97.88           |
| SSIIIa-deficient mutant       | 62.23 | 227    | 1        | 0.8         | 60.73 | 250    | 0.31     | 0.29        | 95.7            |
| SSIIIa/BEIIb-deficient mutant | 62.05 | 228    | 1        | 0.6         | 60.4  | 252    | 0.55     | 0.46        | 97.47           |
